# Supplementary material for: Age, Sex and Overall Health, Measured As Frailty, Modify Myofilament Proteins in Hearts From Naturally Aging Mice
Source: PubMed Central journal article supplement (PMC7308399; doi:10.1038/s41598-020-66903-z), 2020-06-22

**SUPPLEMENTARY FILES**

**AGE, SEX AND OVERALL HEALTH, MEASURED AS FRAILITY,  
MODIFY MYOFILAMENT PROTEINS IN HEARTS FROM NATURALLY  
AGING MICE**

Alice E Kane<sup>1,2</sup>, Elise S Bisset<sup>2</sup>, Kaitlyn M Keller<sup>2</sup>, Anjali Ghimire<sup>2</sup>,

W Glen Pyle<sup>3,4</sup> and Susan E Howlett<sup>2,5</sup>

**Affiliations**

<sup>1</sup>Blavatnik Institute, Department of Genetics, Paul F. Glenn Center for Biology of Aging Research at Harvard Medical School, Boston, MA

<sup>2</sup>Department of Pharmacology, Dalhousie University, Halifax, NS, Canada

<sup>3</sup>Department of Biomedical Sciences, University of Guelph, Guelph, Ontario, Canada

<sup>4</sup>IMPART team Canada Investigator Network

<sup>5</sup>Department of Medicine (Geriatric Medicine), Dalhousie University, Halifax, NS, Canada

**Corresponding author**

Susan Howlett, PhD

Department of Pharmacology

Sir Charles Tupper Medical Building

PO Box 15000

Halifax, Nova Scotia

Canada B3H 4R2

Phone: +1 902 494 3552

Email: susan.howlett@dal.ca

**Running title:** Sex and frailty modify myofilament proteins in aging

Supplementary Figure 1

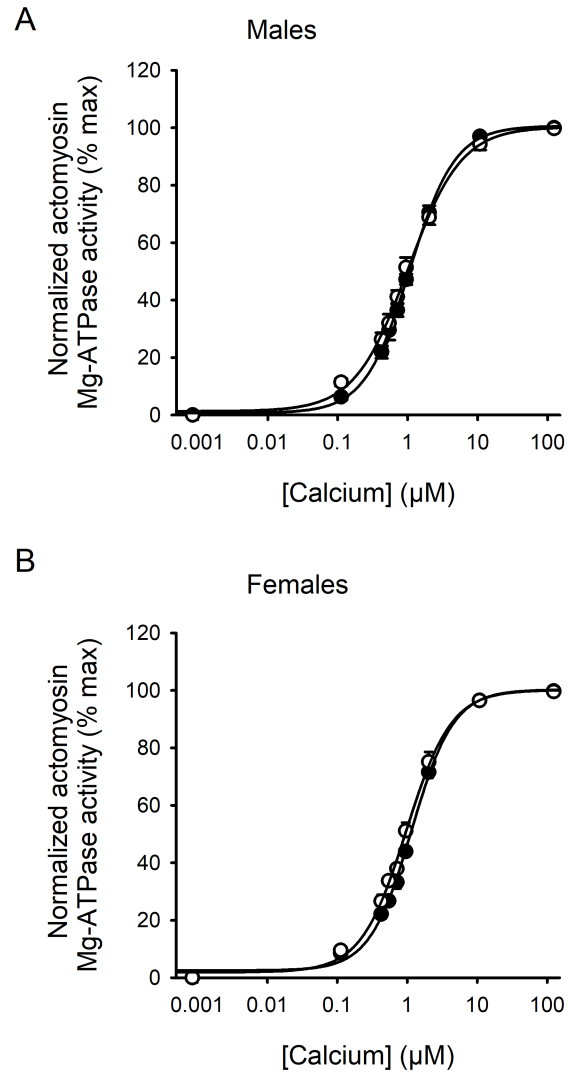

Supplementary Figure 2

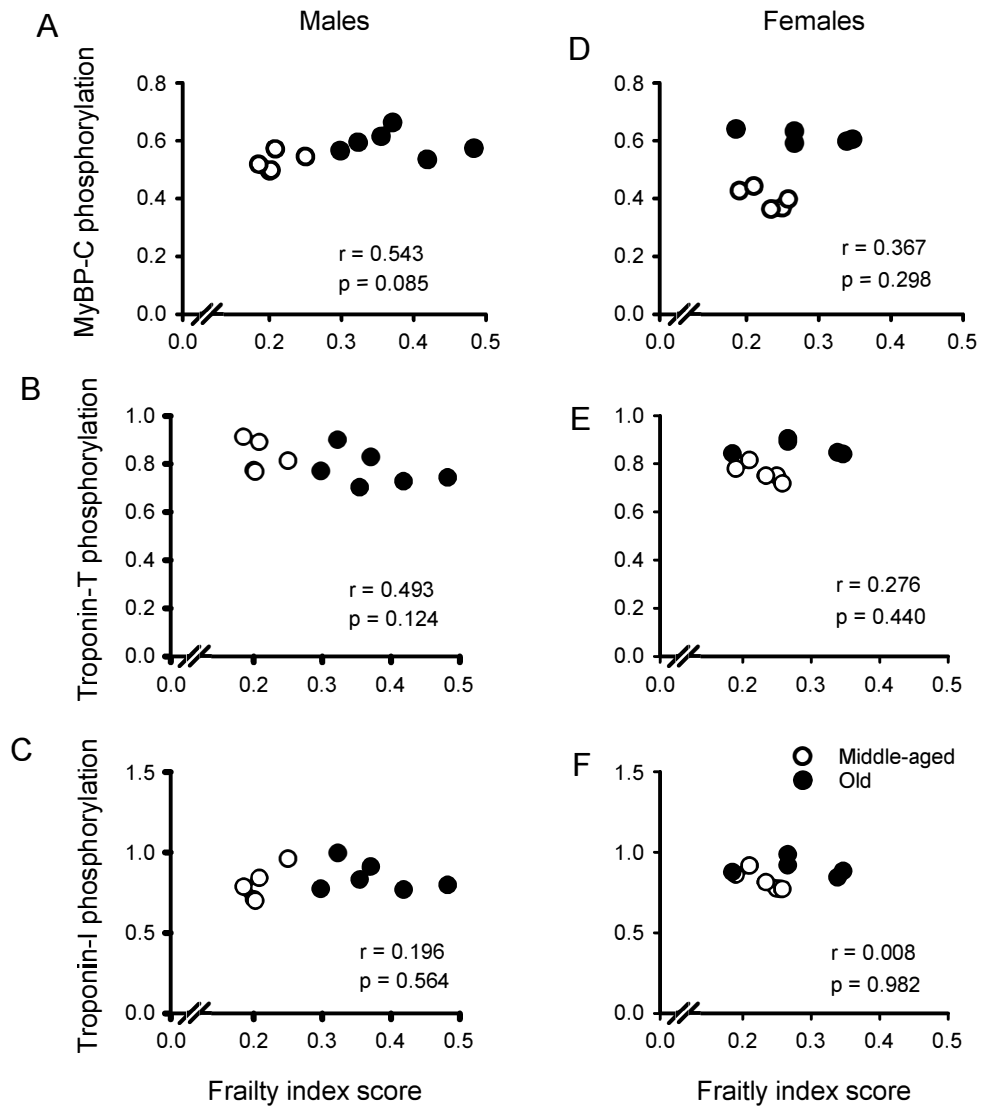

Supplement: 41598_2020_66903_MOESM1_ESM.pdf [file 41598_2020_66903_MOESM1_ESM.pdf]
